# Supplementary material for: Macroscopic and microscopic investigation of uranium elimination by Ca–Mg–Al-layered double hydroxide supported nanoscale zero valent iron
Source: Royal Society of Chemistry journal article supplement (doi:10.1039/c8qi00779a), 2018-01-01
Supplement: c8qi00779a1.pdf [file c8qi00779a1.pdf]

## Electronic Supplementary Information

### **Macroscopic and microscopic investigation of uranium elimination by Ca-Mg-Al-layered double hydroxide supported nanoscale zero valent iron**

Hongwei Pang,<sup>a</sup> Yihan Wu,<sup>a</sup> Shuyi Huang,<sup>a</sup> Congcong Ding,<sup>b</sup> Shun Li,<sup>a</sup> Xiangxue Wang,<sup>\*a,c</sup> Shujun Yu,<sup>\*a</sup> Zhongshan Chen,<sup>a</sup> Gang Song<sup>d</sup> and Xiangke Wang<sup>\*a</sup>

a. College of Environmental Science and Engineering, North China Electric Power University, Beijing 102206, PR China.

b. Fundamental Science on Nuclear Wastes and Environmental Safety Laboratory, Southwest University of Science and Technology, Mianyang 621010, P. R. China

c. Department of Environmental Science and Engineering, North China Electric Power University, Baoding 071003, PR China.

d. Guangdong Provincial Key Laboratory of Radionuclides Pollution Control and Resources, Guangzhou 510006, P.R. China.

Email: wang730304@163.com, sjyu@ncepu.edu.cn, xkwang@ncepu.edu.cn;

Fax: +86-10-61772890; Tel: +86-10-61772890

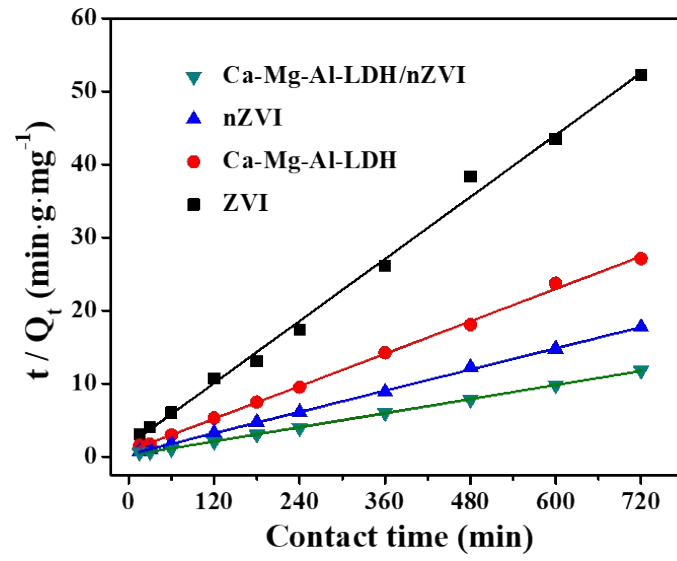

Fig. S1. The linear of kinetic experimental data fitting via the pseudo-second-order kinetic model.
